# Supplementary material for: A Simple and Safe Method for Checking the Position of Central Venous Catheters—A New and Reliable Threshold for Right Atrial Swirl Sign in Microbubbles Tests
Source: MDPI journal article supplement (doi:10.3390/jcm13061657), 2024-03-14
Supplement: s1 [file s1]

**Table S1.** The current study situation on micro bubbles test.

| Author                         | Amir and Knio et al.                      | Corradi et al.                    | Cortellaro et al.                   | Duran-Gehring et al. | Gidaro et al.                                         | Iacobone et al.                                                                           |
|--------------------------------|-------------------------------------------|-----------------------------------|-------------------------------------|----------------------|-------------------------------------------------------|-------------------------------------------------------------------------------------------|
| Year, country                  | 2017, United States                       | 2022, Italy                       | 2014, Italy                         | 2014, United States  | 2021, Italy                                           | 2020, Italy                                                                               |
| Patients (catheters, n)        | 137 (137)                                 | 111 (111)                         | 71 (71)                             | 46 (46)              | 125 (125)                                             | 42 (42)                                                                                   |
| Setting                        | OR (80%), ICU (20%)                       | OR (100%)                         | ED (100%)                           | ED (100%)            | -                                                     | ICU, Vascular Access Unit                                                                 |
| Catheter insertion site (%)    | RIJV: 89.7, LIJV: 5.1, RSV: 0.7, LSV: 4.4 | IJV: 100                          | RIJV: 62, LIJV: 24, RSV: 10, LSV: 4 | IJV: 91, SV: 9       | Basilic vein: 63, brachial vein: 35, cephalic vein: 2 | IJV: 73.8, basilic vein: 14.3, axillary vein: 7.1, brachial vein: 4.8                     |
| TTE views                      | Subcostal, apical                         | Subcostal, apical                 | Subcostal, apical                   | Subxiphoid           | Subcostal, apical                                     | Subcostal, apical                                                                         |
| Misplaced catheters (TTE, %)   | 2.4 (3/124)                               | 32 (36/111)                       | 4.2 (3/71)                          | 6.5 (3/46)           | -                                                     | all: 4.8 (2/42), CICC: 6.3 (2/34)                                                         |
| Lung US views                  | All intercostal spaces on MCL             | Not applied                       | Not applied                         | Anterior chest       | Not applied                                           | On PSL and laterally to the AAL in 3rd to 5th intercostal space                           |
| Pneumothorax rate (Lung US, %) | 0 (123/123)                               | -                                 | -                                   | 4.4 (2/46)           | -                                                     | 0                                                                                         |
| Comparative method             | CXR                                       | TEE (and CXR)                     | CXR                                 | CXR                  | CXR                                                   | CXR                                                                                       |
| Misplaced catheters (CXR, %)   | 0.7 (1/137)                               | 11 (12/111), TEE: 33 (37/111)     | 8.5 (6/71)                          | 6.5 (3/46)           | -                                                     | all: 4.8 (2/42), CICC: 6.3 (2/34)                                                         |
| Pneumothorax rate (CXR, %)     | 0 (0/137)                                 | -                                 | -                                   | 4.4 (2/46)           | -                                                     | -                                                                                         |
| Push to bubbles time (s)       | -                                         | -                                 | -                                   | -                    | Overall: 2.3 ± 0.8                                    | Positive RASS: 0.89 ± 0.33 (CICC), 1.1 ± 0.20 (PICC)<br>Negative RASS: 3.65 ± 2.00 (CICC) |
| Sensitivity, specificity (%)   | -                                         | Subcostal: 97, 90; apical: 22, 94 | 33, 98                              | 100, 100             | -                                                     | 100, 100                                                                                  |
| PPV, NPV (%)                   | -                                         | Subcostal: 83, 98; apical: 66, 70 | 67, 94                              | 100, 100             | -                                                     | 100, 100                                                                                  |

|                    |                                                       |   |   |   |                                                                                      |                 |
|--------------------|-------------------------------------------------------|---|---|---|--------------------------------------------------------------------------------------|-----------------|
| <b>Annotations</b> | Combination of RASS and use of US to locate guidewire | - | - | - | Despite using peripheral catheters in no central position 29.5% had MBT $\leq 2.0$ s | 32 CICC, 8 PICC |
|--------------------|-------------------------------------------------------|---|---|---|--------------------------------------------------------------------------------------|-----------------|

| <b>Author</b>                         | <b>Korsten et al.</b>              | <b>Meggiolaro et al.</b>                                                                     | <b>Vezzani et al.</b>                                           | <b>Weekes et al.</b>                                                   | <b>Weekes et al.</b>                                         | <b>Wen et al.</b> |
|---------------------------------------|------------------------------------|----------------------------------------------------------------------------------------------|-----------------------------------------------------------------|------------------------------------------------------------------------|--------------------------------------------------------------|-------------------|
| <b>Year, country</b>                  | 2018, Germany                      | 2015, Italy                                                                                  | 2010, Italy                                                     | 2015, United States                                                    | 2014, United States                                          | 2014, Germany     |
| <b>Patients (catheters, n)</b>        | 100 (100)                          | 105 (105)                                                                                    | 99 (99)                                                         | 151 (151)                                                              | 142 (135, 152)                                               | 202 (219)         |
| <b>Setting</b>                        | ICU, IMC                           | OR (100%)                                                                                    | ICU                                                             | ED (89%), ICU (11%)                                                    | ED, ICU                                                      | Dialysis Center   |
| <b>Catheter insertion site (%)</b>    | RIJV: 53, LIJV: 41, RSV: 2, LSV: 4 | RIJV: 66, LIJV: 9, RSV: 18, LSV: 7                                                           | IJV: 23, SV: 77                                                 | RIJV: 69.5, LIJV: 21.1, RSV: 5.3, LSV: 4.0                             | IJV: 79, SV: 21                                              | IJV: 100          |
| <b>TTE views</b>                      | Subcostal, apical                  | Subcostal, apical                                                                            | Subcostal                                                       | Subcostal, apical                                                      | Subcostal, apical                                            | Subxiphoid        |
| <b>Misplaced catheters (TTE, %)</b>   | 17 (17/100)                        | 6 (7/105, performing qualitative MBT), 8.6 (9/105, performing usual TTE and vascular US)     | 29.3 (29/99)                                                    | 2.0 (3/135)                                                            | 2.2 (3/135)                                                  | 0.9 (2/219)       |
| <b>Lung US views</b>                  | Not applied                        | Longitudinal and transversal scanning of both hemithoraces                                   | On PSL and laterally to the AAL in 3rd to 5th intercostal space | Anterior chest (on MCL at right hemithorax, on AAL at left hemithorax) | Not applied                                                  | Not applied       |
| <b>Pneumothorax rate (Lung US, %)</b> | -                                  | 0                                                                                            | 4 (4/99)                                                        | 0                                                                      | -                                                            | -                 |
| <b>Comparative method</b>             | CXR                                | CXR                                                                                          | CXR                                                             | CXR                                                                    | CXR                                                          | CXR               |
| <b>Misplaced catheters (CXR, %)</b>   | 12 (12/100)                        | 13 (14/105)                                                                                  | 28.3 (28/99)                                                    | 2.7 (4/135)                                                            | 3 (4/135)                                                    | 0.9 (2/219)       |
| <b>Pneumothorax rate (CXR, %)</b>     | 1 (1/100)                          | 0                                                                                            | 2 (2/99)                                                        | 0                                                                      | 1.5 (2/136)                                                  | 0                 |
| <b>Push to bubbles time (s)</b>       | -                                  | Overall: 0.18 [0.13-0.32]<br>Positive RASS: 0.17 [0.12-0.23]<br>Negative RASS: 1.4 [0.7-2.2] | -                                                               | -                                                                      | Overall: 1.1 ( $\pm$ 0.3)<br>Negative RASS: 5.0 ( $\pm$ 1.7) | -                 |
| <b>Sensitivity, specificity (%)</b>   | 100, 94                            | 50, 100 (performing qualitative MBT); 64, 100 (performing                                    | 96, 93                                                          | 75, 100                                                                | 75, 100                                                      | 100, 100          |

|                     |         |                                                                                      |                                            |         |         |          |
|---------------------|---------|--------------------------------------------------------------------------------------|--------------------------------------------|---------|---------|----------|
|                     |         | usual TTE and vascular US)                                                           |                                            |         |         |          |
| <b>PPV, NPV (%)</b> | 70, 100 | 100, 93 (performing qualitative MBT); 100, 95 (performing usual TTE and vascular US) | -                                          | 100, 99 | 100, 99 | 100, 100 |
| <b>Annotations</b>  | -       | Elaborate protocol with electrical measuring device and scanning of image frames     | Combined MBT and vascular US of IJV and SV | -       | -       | -        |

Annotations: AAL: anterior axillary line, CICC: centrally inserted central catheter, CVC: central venous catheter, CXR: Chest X-ray, ED: Emergency Department, ICU: Intensive care unit, IJV: Internal jugular vein, IMC: Intermediate care unit, LIJV: left internal jugular vein, LSV: left subclavian vein, MBT: micro bubbles time, MCL: midclavicular line, NPV: negative predictive value, OR: operating room, PICC: peripherally inserted central catheter, PPV: positive predictive value, PSL: parasternal line, RASS: rapid atrial swirl sign, RIJV: right internal jugular vein, RSV: right subclavian vein, SV: subclavian vein, TEE: transoesophageal echocardiography, TTE: transthoracic echocardiography, US: ultrasound.
